# Supplementary material
Source: PubMed Central journal article supplement (PMC7032071)
Supplement: NIHMS1545236-supplement-1.pdf [file NIHMS1545236-supplement-1.pdf]

**Fig. S1**

**(A)**

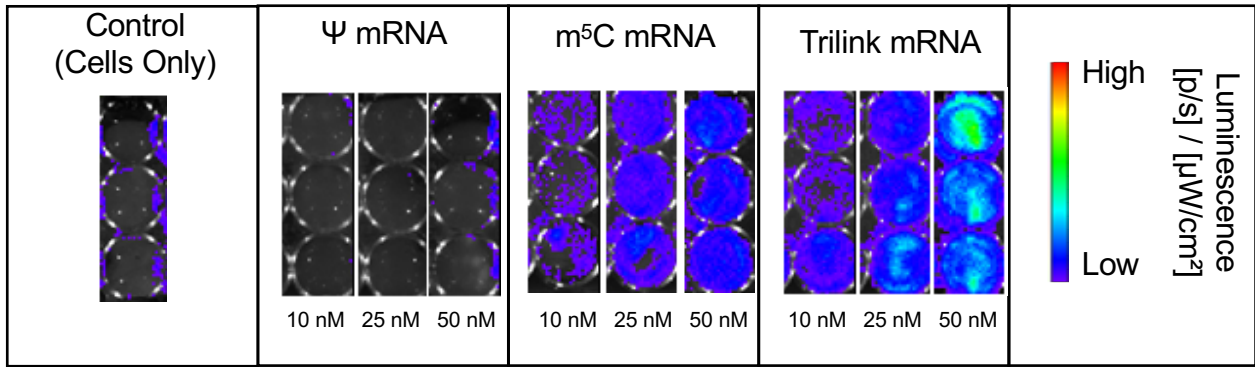

**(B)**

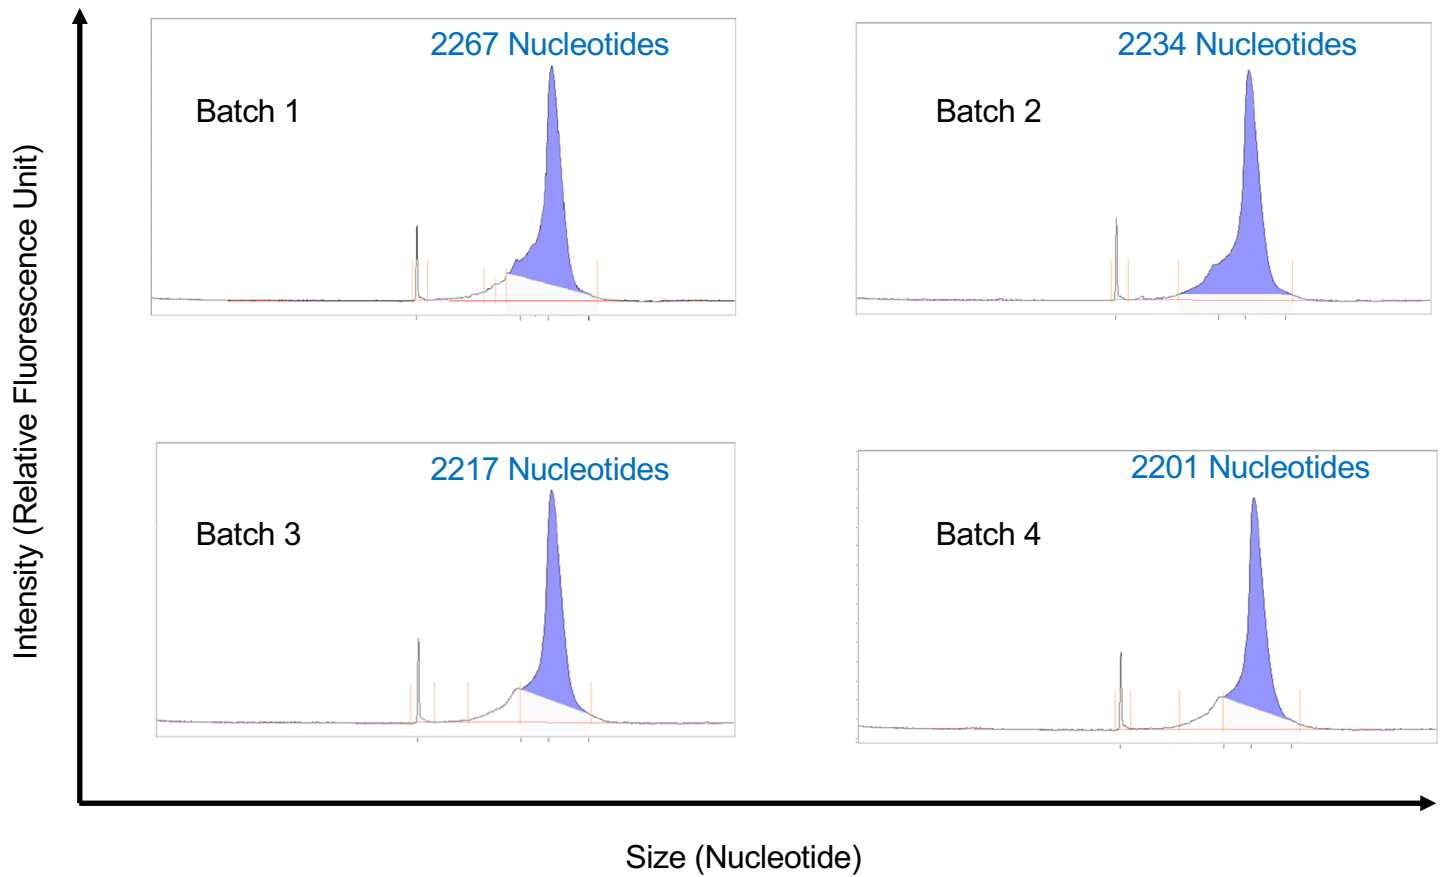

**Fig. S1. Barcoded mRNA (b-mRNA) optimization and quality control.** (A) bEnd.3 cells were treated with LNPs encapsulating different b-mRNA (modified with either pseudouridine ( $\psi$ ) or 5-methylcytosine (m<sup>5</sup>C)) or commercially available Trilink-mRNA at different concentration. Luciferase activity was assessed at 48 hours after treatment. (B) Representative Bioanalyzer trace of b-mRNA from different batches.

**Fig. S2**

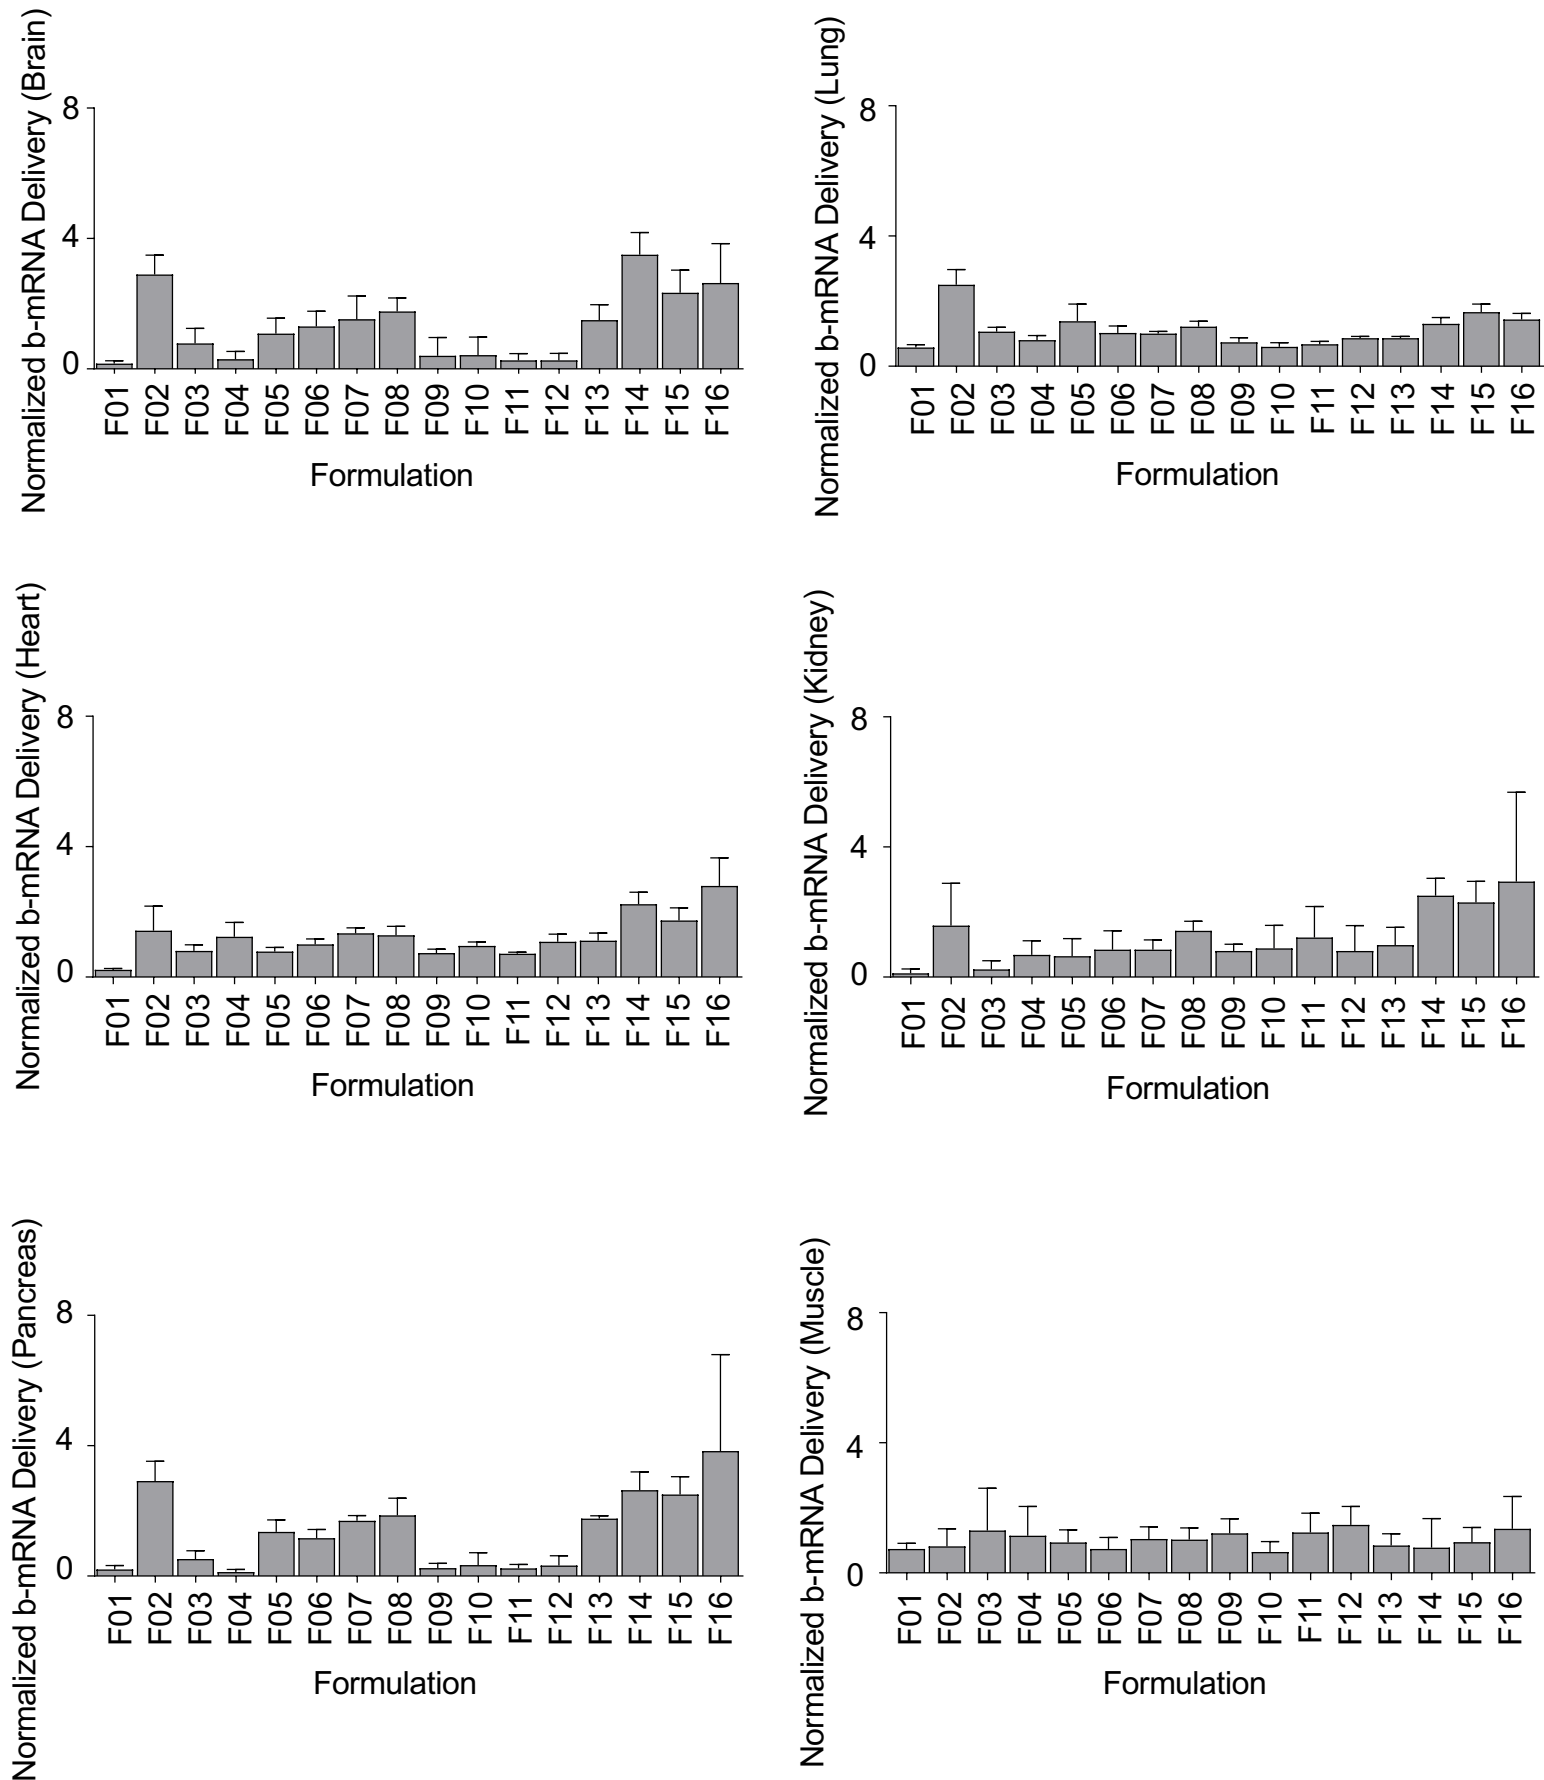

**Fig. S2. F2, F14, F15, and F16 are more efficient than other LNP formulations to deliver barcoded mRNA (b-mRNA) to the brain, lung, heart, kidney, pancreas, and muscle.** 16 b-mRNA LNP formulations were pooled and injected into C57BL/6 mice intravenously (0.25  $\mu\text{g}$  of each b-mRNA was included in a single injection). 4 hours post injection, b-mRNA delivery to the lung, kidney, heart, pancreas, brain, and muscle were quantified. N = 4 mice per group. Data were plotted as mean  $\pm$  SD.

**Fig. S3**

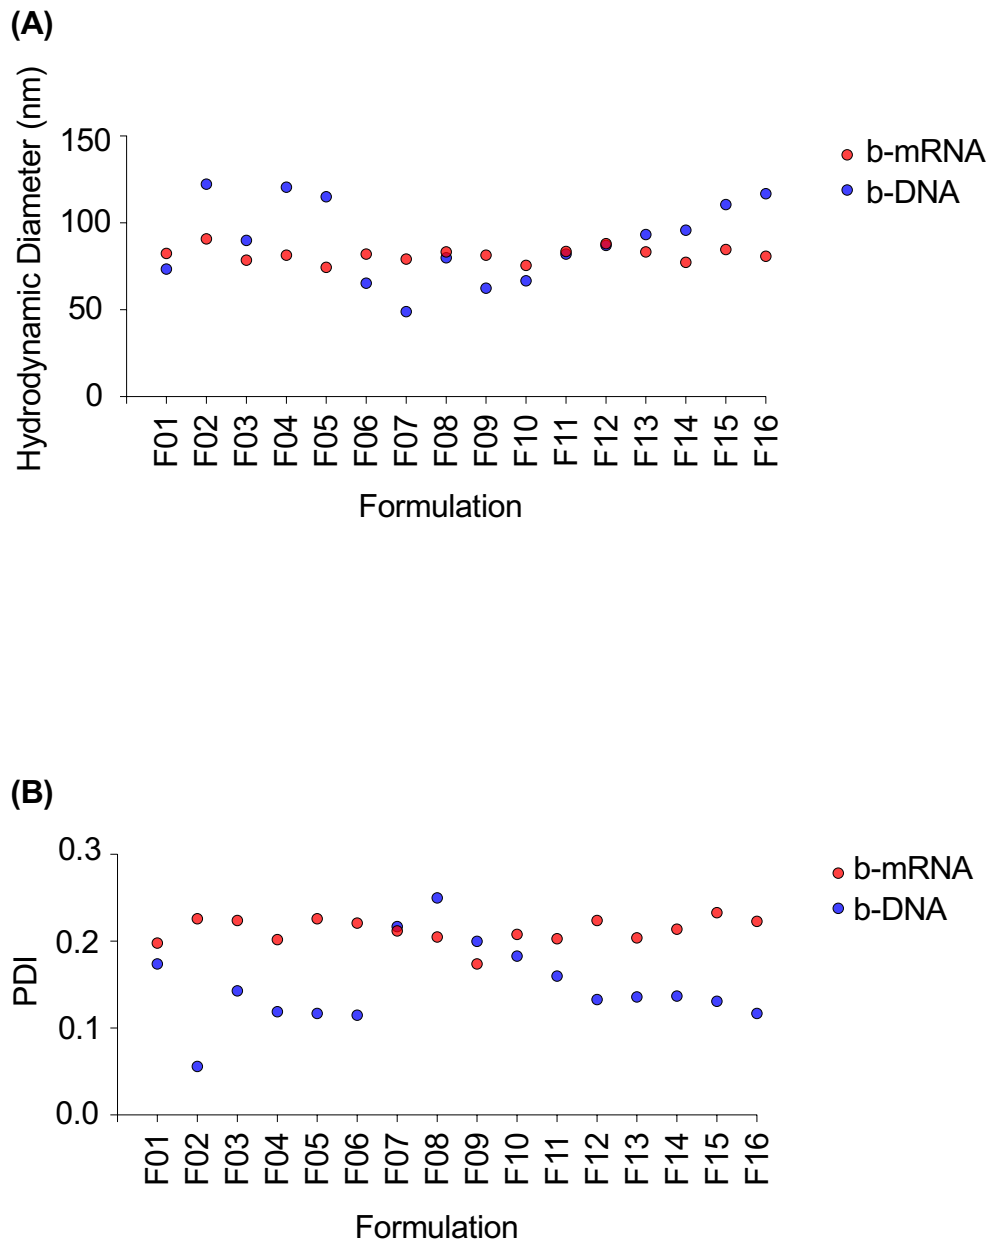

**Fig. S3. Encapsulation of barcoded DNA (b-DNA) versus b-mRNA in LNPs alters LNP physical properties.** Hydrodynamic diameter and PDI of LNPs encapsulating b-mRNA or b-DNA were analyzed by dynamic light scattering and were shown in (A) and (B) respectively.

**Fig. S4**

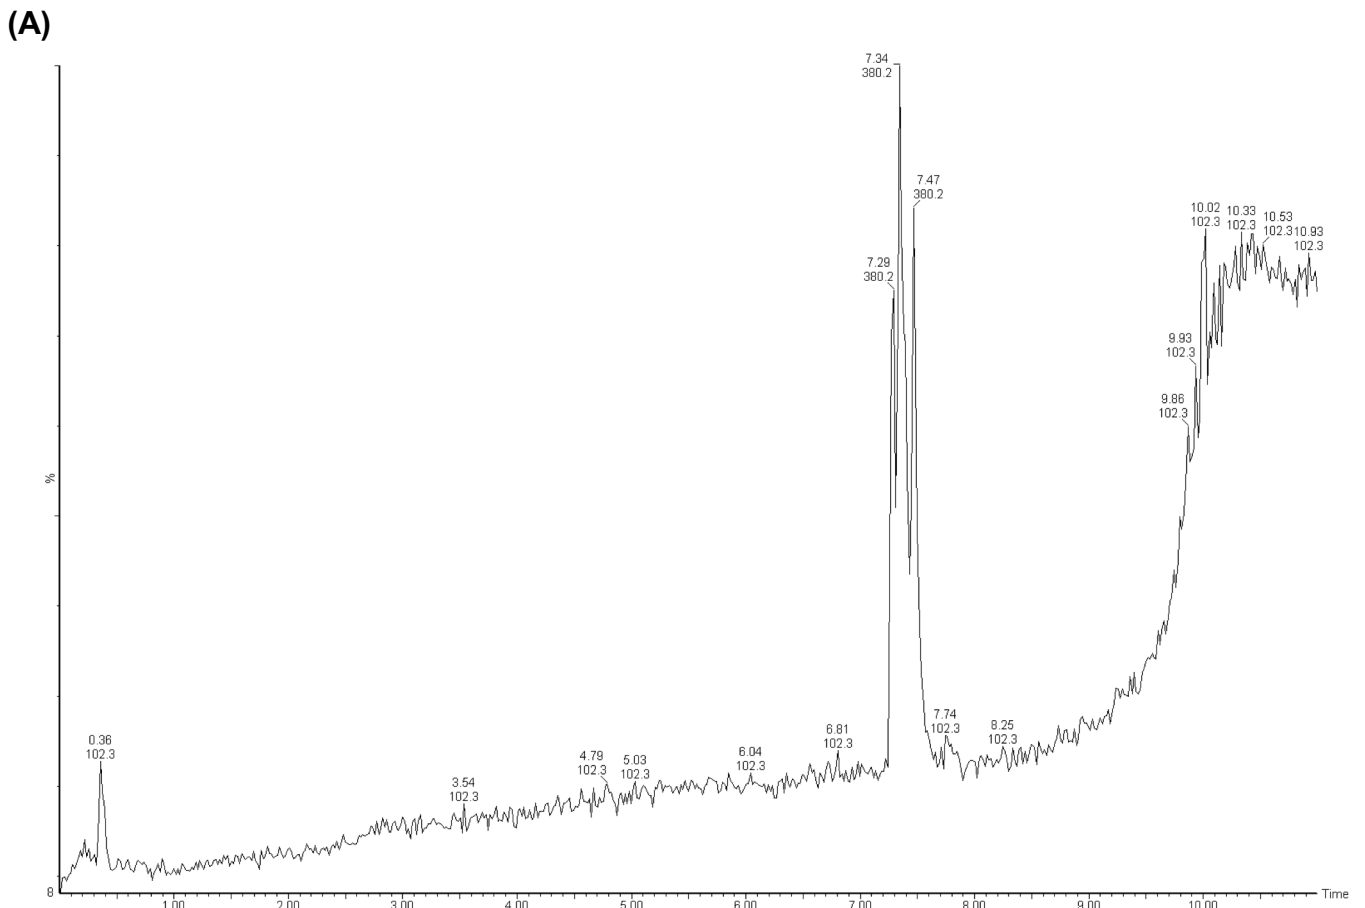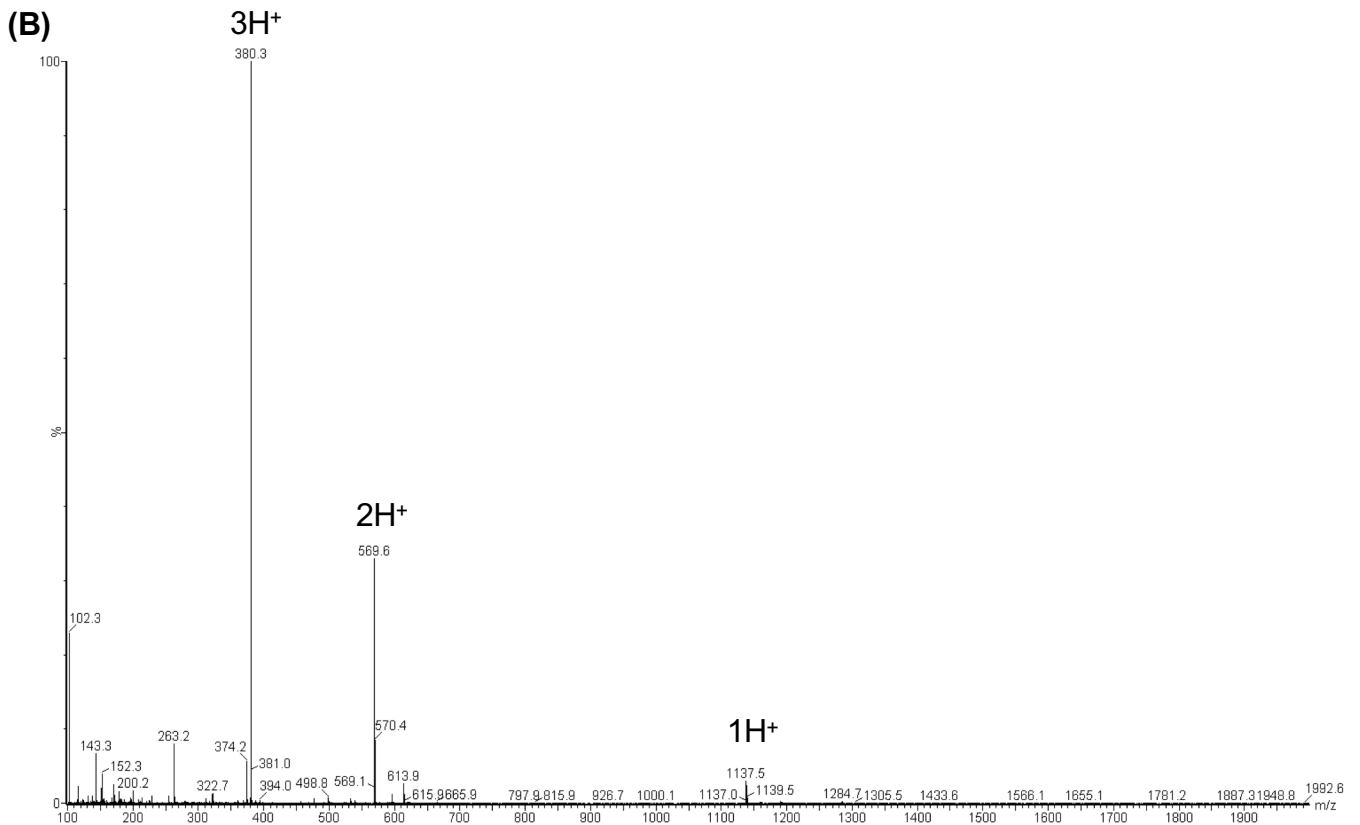

**Fig. S4. Ionizable lipid chemical characterization. High-performance liquid chromatography (HPLC) photo diode array detection and mass spectrometry analysis were shown in (A) and (B) respectively.**

# Table 1

**Table. S1** Library of primer sequences

| Primers         | Sequence                                                 |
|-----------------|----------------------------------------------------------|
| Miseq primer 1  | CAAGCAGAAGACGGCATAACGAGATCCTGGTAGGTGACTGGAGTTCAGACGTGTG  |
| Miseq primer 2  | CAAGCAGAAGACGGCATAACGAGATTAAGCATGGTACTGGAGTTCAGACGTGTG   |
| Miseq primer 3  | CAAGCAGAAGACGGCATAACGAGATAGATGTGCGTGACTGGAGTTCAGACGTGTG  |
| Miseq primer 4  | CAAGCAGAAGACGGCATAACGAGATGTCGAGCAGTGACTGGAGTTCAGACGTGTG  |
| Miseq primer 5  | CAAGCAGAAGACGGCATAACGAGATGAATTGCTGTGACTGGAGTTCAGACGTGTG  |
| Miseq primer 6  | CAAGCAGAAGACGGCATAACGAGATAAGCAACTGTGACTGGAGTTCAGACGTGTG  |
| Miseq primer 7  | CAAGCAGAAGACGGCATAACGAGATCTAACTGGGTGACTGGAGTTCAGACGTGTG  |
| Miseq primer 8  | CAAGCAGAAGACGGCATAACGAGATAGGCTCAAGTGACTGGAGTTCAGACGTGTG  |
| Miseq primer 9  | CAAGCAGAAGACGGCATAACGAGATCAGTTGGTGTGACTGGAGTTCAGACGTGTG  |
| Miseq primer 10 | CAAGCAGAAGACGGCATAACGAGATTCTGGACCGTGACTGGAGTTCAGACGTGTG  |
| Miseq primer 11 | CAAGCAGAAGACGGCATAACGAGATTGTTATACGTGACTGGAGTTCAGACGTGTG  |
| Miseq primer 12 | CAAGCAGAAGACGGCATAACGAGATTCAGCGAAGTGACTGGAGTTCAGACGTGTG  |
| Miseq primer 13 | CAAGCAGAAGACGGCATAACGAGATGTCAAGTTGTGACTGGAGTTCAGACGTGTG  |
| Miseq primer 14 | CAAGCAGAAGACGGCATAACGAGATAGGATGTGGTACTGGAGTTCAGACGTGTG   |
| Miseq primer 15 | CAAGCAGAAGACGGCATAACGAGATCATTCCGAGTGACTGGAGTTCAGACGTGTG  |
| Miseq primer 16 | CAAGCAGAAGACGGCATAACGAGATACATCCTTGTGACTGGAGTTCAGACGTGTG  |
| Miseq primer 17 | CAAGCAGAAGACGGCATAACGAGATTCGTGTGCGTGACTGGAGTTCAGACGTGTG  |
| Miseq primer 18 | CAAGCAGAAGACGGCATAACGAGATTCGCCAGAGTGACTGGAGTTCAGACGTGTG  |
| Miseq primer 19 | CAAGCAGAAGACGGCATAACGAGATTCGCTATGGTACTGGAGTTCAGACGTGTG   |
| Miseq primer 20 | CAAGCAGAAGACGGCATAACGAGATGGCTCCTGGTACTGGAGTTCAGACGTGTG   |
| Miseq primer 21 | CAAGCAGAAGACGGCATAACGAGATATCCGACAGTGACTGGAGTTCAGACGTGTG  |
| Miseq primer 22 | CAAGCAGAAGACGGCATAACGAGATAACATAATGTGACTGGAGTTCAGACGTGTG  |
| Miseq primer 23 | CAAGCAGAAGACGGCATAACGAGATATGGTAGGGTGACTGGAGTTCAGACGTGTG  |
| Miseq primer 24 | CAAGCAGAAGACGGCATAACGAGATGCTAAGTAGTGACTGGAGTTCAGACGTGTG  |
| Miseq primer 25 | CAAGCAGAAGACGGCATAACGAGATACTTCTTCGTGACTGGAGTTCAGACGTGTG  |
| Miseq primer 26 | CAAGCAGAAGACGGCATAACGAGATTAGATCCTGTGACTGGAGTTCAGACGTGTG  |
| Miseq primer 27 | CAAGCAGAAGACGGCATAACGAGATTTACTGTCTGACTGGAGTTCAGACGTGTG   |
| Miseq primer 28 | CAAGCAGAAGACGGCATAACGAGATGGCATAGGGTGACTGGAGTTCAGACGTGTG  |
| Miseq primer 29 | CAAGCAGAAGACGGCATAACGAGATCAAGGCCAGTGACTGGAGTTCAGACGTGTG  |
| Miseq primer 30 | CAAGCAGAAGACGGCATAACGAGATGACGCTATGTGACTGGAGTTCAGACGTGTG  |
| Miseq primer 31 | CAAGCAGAAGACGGCATAACGAGATAAGGGCGACGTGACTGGAGTTCAGACGTGTG |
| Miseq primer 32 | CAAGCAGAAGACGGCATAACGAGATCCTAGAAATGTGACTGGAGTTCAGACGTGTG |
| Miseq primer 33 | CAAGCAGAAGACGGCATAACGAGATTGGTAACGGTGACTGGAGTTCAGACGTGTG  |
| Miseq primer 34 | CAAGCAGAAGACGGCATAACGAGATCATCAGACGTGACTGGAGTTCAGACGTGTG  |
| Miseq primer 35 | CAAGCAGAAGACGGCATAACGAGATGTGCGTAAGTGACTGGAGTTCAGACGTGTG  |
| Miseq primer 36 | CAAGCAGAAGACGGCATAACGAGATCTATTCAAGTGACTGGAGTTCAGACGTGTG  |
| Miseq primer 37 | CAAGCAGAAGACGGCATAACGAGATAGTGTCTTGTGACTGGAGTTCAGACGTGTG  |
| Miseq primer 38 | CAAGCAGAAGACGGCATAACGAGATCCTTGCTGGTACTGGAGTTCAGACGTGTG   |
| Miseq primer 39 | CAAGCAGAAGACGGCATAACGAGATTTGCTGGAGTGACTGGAGTTCAGACGTGTG  |
| Miseq primer 40 | CAAGCAGAAGACGGCATAACGAGATAGCTCTGGGTACTGGAGTTCAGACGTGTG   |
| Miseq primer 41 | CAAGCAGAAGACGGCATAACGAGATACCAAGGAGTGACTGGAGTTCAGACGTGTG  |
| Miseq primer 42 | CAAGCAGAAGACGGCATAACGAGATGATAACCTGTGACTGGAGTTCAGACGTGTG  |
| Miseq primer 43 | CAAGCAGAAGACGGCATAACGAGATTAGATGACGTGACTGGAGTTCAGACGTGTG  |
| Miseq primer 44 | CAAGCAGAAGACGGCATAACGAGATTGCCAAGGGTGACTGGAGTTCAGACGTGTG  |
| Miseq primer 45 | CAAGCAGAAGACGGCATAACGAGATGACCGAGAGTGACTGGAGTTCAGACGTGTG  |
| Miseq primer 46 | CAAGCAGAAGACGGCATAACGAGATCAGACAATGTGACTGGAGTTCAGACGTGTG  |
| Miseq primer 47 | CAAGCAGAAGACGGCATAACGAGATCTAGGTTCTGACTGGAGTTCAGACGTGTG   |
| Miseq primer 48 | CAAGCAGAAGACGGCATAACGAGATGTTTCATTAGTGACTGGAGTTCAGACGTGTG |

# Table 2

**Table S2.** Library of IVT templates

| Barcode      | Sequence                                                        |
|--------------|-----------------------------------------------------------------|
| b-mRNA 1     | GCCCAGTCATAGCCGAATAG NNNNNNNNNN AAGTACCCTCCC GCCCGACTCTAGAATTA  |
| b-mRNA 2     | GCCCAGTCATAGCCGAATAG NNNNNNNNNN GGCAATTGTCCC GCCCGACTCTAGAATTA  |
| b-mRNA 3     | GCCCAGTCATAGCCGAATAG NNNNNNNNNN AGGTGCGTTACCG CCCGACTCTAGAATTA  |
| b-mRNA 4     | GCCCAGTCATAGCCGAATAG NNNNNNNNNN CGACGATCATCCG CCCGACTCTAGAATTA  |
| b-mRNA 5     | GCCCAGTCATAGCCGAATAG NNNNNNNNNN ATGGGAGACACCG CCCCGACTCTAGAATTA |
| b-mRNA 6     | GCCCAGTCATAGCCGAATAG NNNNNNNNNN CTGTTTCTCCC GCCCGACTCTAGAATTA   |
| b-mRNA 7     | GCCCAGTCATAGCCGAATAG NNNNNNNNNN CGTTTGTACGCC GCCCGACTCTAGAATTA  |
| b-mRNA 8     | GCCCAGTCATAGCCGAATAG NNNNNNNNNN CCCACAAATCCC GCCCGACTCTAGAATTA  |
| b-mRNA 9     | GCCCAGTCATAGCCGAATAG NNNNNNNNNN AAGGCTGCAACCG CCCGACTCTAGAATTA  |
| b-mRNA 10    | GCCCAGTCATAGCCGAATAG NNNNNNNNNN GTCAGCATTCCC GCCCGACTCTAGAATTA  |
| b-mRNA 11    | GCCCAGTCATAGCCGAATAG NNNNNNNNNN CCTCATGGATCCG CCCCGACTCTAGAATTA |
| b-mRNA 12    | GCCCAGTCATAGCCGAATAG NNNNNNNNNN CATCGTGGAACCG CCCGACTCTAGAATTA  |
| b-mRNA 13    | GCCCAGTCATAGCCGAATAG NNNNNNNNNN AATTCCCAGCCC GCCCGACTCTAGAATTA  |
| b-mRNA 14    | GCCCAGTCATAGCCGAATAG NNNNNNNNNN CGTCGTTTTGCC GCCCGACTCTAGAATTA  |
| b-mRNA 15    | GCCCAGTCATAGCCGAATAG NNNNNNNNNN AAAGGCGAGACCG CCCGACTCTAGAATTA  |
| b-mRNA 16    | GCCCAGTCATAGCCGAATAG NNNNNNNNNN CTCTGATCTGCC GCCCGACTCTAGAATTA  |
| b-mRNA 17    | GCCCAGTCATAGCCGAATAG NNNNNNNNNN AGAACGTGTCCC GCCCGACTCTAGAATTA  |
| b-mRNA 18    | GCCCAGTCATAGCCGAATAG NNNNNNNNNN AGACCTTAGCCC GCCCGACTCTAGAATTA  |
| b-mRNA 19    | GCCCAGTCATAGCCGAATAG NNNNNNNNNN AGTTCGAACACCG CCCGACTCTAGAATTA  |
| b-mRNA 20    | GCCCAGTCATAGCCGAATAG NNNNNNNNNN TGCTTTGGGCCGCC CGGACTCTAGAATTA  |
| b-mRNA 21    | GCCCAGTCATAGCCGAATAG NNNNNNNNNN TTCTACCTGCC GCCCGACTCTAGAATTA   |
| b-mRNA 22    | GCCCAGTCATAGCCGAATAG NNNNNNNNNN CGCGATAATGCC GCCCGACTCTAGAATTA  |
| b-mRNA 23    | GCCCAGTCATAGCCGAATAG NNNNNNNNNN TCAGTCTCTGCC GCCCGACTCTAGAATTA  |
| b-mRNA 24    | GCCCAGTCATAGCCGAATAG NNNNNNNNNN GTGCATGTCACCG CCCGACTCTAGAATTA  |
| b-mRNA 25    | GCCCAGTCATAGCCGAATAG NNNNNNNNNN GGAACCAACACCG CCCGACTCTAGAATTA  |
| b-mRNA 26    | GCCCAGTCATAGCCGAATAG NNNNNNNNNN GTTCAGAGAGCC GCCCGACTCTAGAATTA  |
| b-mRNA 27    | GCCCAGTCATAGCCGAATAG NNNNNNNNNN TTGGCTAGTGCC GCCCGACTCTAGAATTA  |
| b-mRNA 28    | GCCCAGTCATAGCCGAATAG NNNNNNNNNN GGCAAAGTCACCG CCCGACTCTAGAATTA  |
| b-mRNA 29    | GCCCAGTCATAGCCGAATAG NNNNNNNNNN CTTGCTGAACCG CCCGACTCTAGAATTA   |
| b-mRNA 30    | GCCCAGTCATAGCCGAATAG NNNNNNNNNN GTATGCCTGTCC GCCCGACTCTAGAATTA  |
| b-mRNA 31    | GCCCAGTCATAGCCGAATAG NNNNNNNNNN TTAGGAGTCGCC GCCCGACTCTAGAATTA  |
| b-mRNA 32    | GCCCAGTCATAGCCGAATAG NNNNNNNNNN AGATAGCGTGCC GCCCGACTCTAGAATTA  |
| b-mRNA 33    | GCCCAGTCATAGCCGAATAG NNNNNNNNNN AAGCGGACTTCC GCCCGACTCTAGAATTA  |
| b-mRNA 34    | GCCCAGTCATAGCCGAATAG NNNNNNNNNN CGGTCTAGATCCG CCCGACTCTAGAATTA  |
| b-mRNA 35    | GCCCAGTCATAGCCGAATAG NNNNNNNNNN AAGGGGATTCCG CCCGACTCTAGAATTA   |
| b-mRNA 36    | GCCCAGTCATAGCCGAATAG NNNNNNNNNN CAGATGCGAACCG CCCGACTCTAGAATTA  |
| b-mRNA 37    | GCCCAGTCATAGCCGAATAG NNNNNNNNNN GGAACCTCAACCG CCCGACTCTAGAATTA  |
| b-mRNA 38    | GCCCAGTCATAGCCGAATAG NNNNNNNNNN GATTGGCCAACCG CCCGACTCTAGAATTA  |
| b-mRNA 39    | GCCCAGTCATAGCCGAATAG NNNNNNNNNN TGTCGCCTTTCC GCCCGACTCTAGAATTA  |
| b-mRNA 40    | GCCCAGTCATAGCCGAATAG NNNNNNNNNN CAGCGACATTCCG CCCGACTCTAGAATTA  |
| b-mRNA 41    | GCCCAGTCATAGCCGAATAG NNNNNNNNNN CCATACGTTGCC GCCCGACTCTAGAATTA  |
| b-mRNA 42    | GCCCAGTCATAGCCGAATAG NNNNNNNNNN GGTTAGGTAGCC GCCCGACTCTAGAATTA  |
| b-mRNA 43    | GCCCAGTCATAGCCGAATAG NNNNNNNNNN TACACCGTGACCG CCCGACTCTAGAATTA  |
| b-mRNA 44    | GCCCAGTCATAGCCGAATAG NNNNNNNNNN TACTTCTGGGCCGCC CGGACTCTAGAATTA |
| b-mRNA 45    | GCCCAGTCATAGCCGAATAG NNNNNNNNNN AAGCGCTTGTCC GCCCGACTCTAGAATTA  |
| b-mRNA 46    | GCCCAGTCATAGCCGAATAG NNNNNNNNNN CGTTAATCCC GCCCGACTCTAGAATTA    |
| b-mRNA 47    | GCCCAGTCATAGCCGAATAG NNNNNNNNNN TATCACGAGGCC GCCCGACTCTAGAATTA  |
| b-mRNA 48    | GCCCAGTCATAGCCGAATAG NNNNNNNNNN CCGAATAGTCCC GCCCGACTCTAGAATTA  |
| Luc T7 F2    | TAATAGGACTCACTATAggg CATTCCGGTACTGTTGG                          |
| Luc Seq US1  | AGACGTGTGCTCTTCCGATCT GGACGAGGTGCCTAAAGGAC                      |
| NeoR Seq US2 | ACACGACGCTCTTCCGATCT GCCCAGTCATAGCCGAATAG                       |

# Table 3

**Table S3.** Library of b-DNA sequences

| Barcode  | Sequences                                                             |
|----------|-----------------------------------------------------------------------|
| b-DNA 1  | A*G*A*CGTGTGCTCTCCGATCT GAGGGTACTT NNNNNNNNNN AGATCGGAAGAGCGTCG*T*G*T |
| b-DNA 2  | A*G*A*CGTGTGCTCTCCGATCT GACAATTGCC NNNNNNNNNN AGATCGGAAGAGCGTCG*T*G*T |
| b-DNA 3  | A*G*A*CGTGTGCTCTCCGATCT TAACGCACCT NNNNNNNNNN AGATCGGAAGAGCGTCG*T*G*T |
| b-DNA 4  | A*G*A*CGTGTGCTCTCCGATCT ATGATCGTCG NNNNNNNNNN AGATCGGAAGAGCGTCG*T*G*T |
| b-DNA 5  | A*G*A*CGTGTGCTCTCCGATCT TGTCTCCAT NNNNNNNNNN AGATCGGAAGAGCGTCG*T*G*T  |
| b-DNA 6  | A*G*A*CGTGTGCTCTCCGATCT GGAGAAACAG NNNNNNNNNN AGATCGGAAGAGCGTCG*T*G*T |
| b-DNA 7  | A*G*A*CGTGTGCTCTCCGATCT CGTACAAACG NNNNNNNNNN AGATCGGAAGAGCGTCG*T*G*T |
| b-DNA 8  | A*G*A*CGTGTGCTCTCCGATCT GATTTGTGGG NNNNNNNNNN AGATCGGAAGAGCGTCG*T*G*T |
| b-DNA 9  | A*G*A*CGTGTGCTCTCCGATCT TTGCAGCCTT NNNNNNNNNN AGATCGGAAGAGCGTCG*T*G*T |
| b-DNA 10 | A*G*A*CGTGTGCTCTCCGATCT GAATGCTGAC NNNNNNNNNN AGATCGGAAGAGCGTCG*T*G*T |
| b-DNA 11 | A*G*A*CGTGTGCTCTCCGATCT ATCCATGAGG NNNNNNNNNN AGATCGGAAGAGCGTCG*T*G*T |
| b-DNA 12 | A*G*A*CGTGTGCTCTCCGATCT TTCCACGATG NNNNNNNNNN AGATCGGAAGAGCGTCG*T*G*T |
| b-DNA 13 | A*G*A*CGTGTGCTCTCCGATCT GCTGGGAATT NNNNNNNNNN AGATCGGAAGAGCGTCG*T*G*T |
| b-DNA 14 | A*G*A*CGTGTGCTCTCCGATCT CAAAACGACG NNNNNNNNNN AGATCGGAAGAGCGTCG*T*G*T |
| b-DNA 15 | A*G*A*CGTGTGCTCTCCGATCT TCTCGCCTTT NNNNNNNNNN AGATCGGAAGAGCGTCG*T*G*T |
| b-DNA 16 | A*G*A*CGTGTGCTCTCCGATCT CAGATCAGAG NNNNNNNNNN AGATCGGAAGAGCGTCG*T*G*T |
| b-DNA 17 | A*G*A*CGTGTGCTCTCCGATCT GACACGTTCT NNNNNNNNNN AGATCGGAAGAGCGTCG*T*G*T |
| b-DNA 18 | A*G*A*CGTGTGCTCTCCGATCT GCTAAGTCT NNNNNNNNNN AGATCGGAAGAGCGTCG*T*G*T  |
| b-DNA 19 | A*G*A*CGTGTGCTCTCCGATCT TGTTGACCT NNNNNNNNNN AGATCGGAAGAGCGTCG*T*G*T  |
| b-DNA 20 | A*G*A*CGTGTGCTCTCCGATCT CCCAAAGACA NNNNNNNNNN AGATCGGAAGAGCGTCG*T*G*T |
| b-DNA 21 | A*G*A*CGTGTGCTCTCCGATCT CAGGTAGGAA NNNNNNNNNN AGATCGGAAGAGCGTCG*T*G*T |
| b-DNA 22 | A*G*A*CGTGTGCTCTCCGATCT CATTATCGCG NNNNNNNNNN AGATCGGAAGAGCGTCG*T*G*T |
| b-DNA 23 | A*G*A*CGTGTGCTCTCCGATCT CAGAGACTGA NNNNNNNNNN AGATCGGAAGAGCGTCG*T*G*T |
| b-DNA 24 | A*G*A*CGTGTGCTCTCCGATCT TGACATGCAC NNNNNNNNNN AGATCGGAAGAGCGTCG*T*G*T |
| b-DNA 25 | A*G*A*CGTGTGCTCTCCGATCT TGTTGTTCC NNNNNNNNNN AGATCGGAAGAGCGTCG*T*G*T  |
| b-DNA 26 | A*G*A*CGTGTGCTCTCCGATCT CTCTCTGAAC NNNNNNNNNN AGATCGGAAGAGCGTCG*T*G*T |
| b-DNA 27 | A*G*A*CGTGTGCTCTCCGATCT CACTAGCAA NNNNNNNNNN AGATCGGAAGAGCGTCG*T*G*T  |
| b-DNA 28 | A*G*A*CGTGTGCTCTCCGATCT TGACTTTGCC NNNNNNNNNN AGATCGGAAGAGCGTCG*T*G*T |
| b-DNA 29 | A*G*A*CGTGTGCTCTCCGATCT TTCAGCGAAG NNNNNNNNNN AGATCGGAAGAGCGTCG*T*G*T |
| b-DNA 30 | A*G*A*CGTGTGCTCTCCGATCT ACAGGCATAC NNNNNNNNNN AGATCGGAAGAGCGTCG*T*G*T |
| b-DNA 31 | A*G*A*CGTGTGCTCTCCGATCT CGACTCCTAA NNNNNNNNNN AGATCGGAAGAGCGTCG*T*G*T |
| b-DNA 32 | A*G*A*CGTGTGCTCTCCGATCT CAGCCTATCT NNNNNNNNNN AGATCGGAAGAGCGTCG*T*G*T |
| b-DNA 33 | A*G*A*CGTGTGCTCTCCGATCT AAGTCCGCTT NNNNNNNNNN AGATCGGAAGAGCGTCG*T*G*T |
| b-DNA 34 | A*G*A*CGTGTGCTCTCCGATCT ATCTAGACCG NNNNNNNNNN AGATCGGAAGAGCGTCG*T*G*T |
| b-DNA 35 | A*G*A*CGTGTGCTCTCCGATCT AATCCCCCTT NNNNNNNNNN AGATCGGAAGAGCGTCG*T*G*T |
| b-DNA 36 | A*G*A*CGTGTGCTCTCCGATCT TTCGCATCTG NNNNNNNNNN AGATCGGAAGAGCGTCG*T*G*T |
| b-DNA 37 | A*G*A*CGTGTGCTCTCCGATCT TTGGAGTTCC NNNNNNNNNN AGATCGGAAGAGCGTCG*T*G*T |
| b-DNA 38 | A*G*A*CGTGTGCTCTCCGATCT TTGGCCAATC NNNNNNNNNN AGATCGGAAGAGCGTCG*T*G*T |
| b-DNA 39 | A*G*A*CGTGTGCTCTCCGATCT AAAGGCCACA NNNNNNNNNN AGATCGGAAGAGCGTCG*T*G*T |
| b-DNA 40 | A*G*A*CGTGTGCTCTCCGATCT AATGTCGCTG NNNNNNNNNN AGATCGGAAGAGCGTCG*T*G*T |
| b-DNA 41 | A*G*A*CGTGTGCTCTCCGATCT CAACGTATGG NNNNNNNNNN AGATCGGAAGAGCGTCG*T*G*T |
| b-DNA 42 | A*G*A*CGTGTGCTCTCCGATCT CTACCTAACC NNNNNNNNNN AGATCGGAAGAGCGTCG*T*G*T |
| b-DNA 43 | A*G*A*CGTGTGCTCTCCGATCT TCACGGTGA NNNNNNNNNN AGATCGGAAGAGCGTCG*T*G*T  |
| b-DNA 44 | A*G*A*CGTGTGCTCTCCGATCT CCCAGAAGTA NNNNNNNNNN AGATCGGAAGAGCGTCG*T*G*T |
| b-DNA 45 | A*G*A*CGTGTGCTCTCCGATCT ACAAGCGCTT NNNNNNNNNN AGATCGGAAGAGCGTCG*T*G*T |
| b-DNA 46 | A*G*A*CGTGTGCTCTCCGATCT GGATTAACCG NNNNNNNNNN AGATCGGAAGAGCGTCG*T*G*T |
| b-DNA 47 | A*G*A*CGTGTGCTCTCCGATCT CCTCGTGATA NNNNNNNNNN AGATCGGAAGAGCGTCG*T*G*T |
| b-DNA 48 | A*G*A*CGTGTGCTCTCCGATCT GACTATTCGG NNNNNNNNNN AGATCGGAAGAGCGTCG*T*G*T |
